# Supplementary material
Source: PubMed Central journal article supplement (PMC6481187)
Supplement: NIHMS1519748-supplement-1.pdf [file NIHMS1519748-supplement-1.pdf]

Trigeminal Nerve Stimulation for ADHD

**Table S1. Secondary Efficacy Measures with Significant Effects for Double-Blind Active vs. Sham Trigeminal Nerve Stimulation (TNS)**

| <b>Measure</b>                         | <b>Effect</b> | <b>F</b> | <b>df</b> | <b>p</b>         |
|----------------------------------------|---------------|----------|-----------|------------------|
| ADHD-RS-Inattentive Subscale           | Group         | <1       | 1/228     | .55              |
|                                        | Time          | 34.30    | 1/228     | <b>&lt;.0001</b> |
|                                        | Time2         | 23.20    | 1/228     | <b>&lt;.0001</b> |
|                                        | Group*Time    | 5.35     | 1/228     | <b>.02</b>       |
| ADHD-RS-Hyperactive/Impulsive Subscale | Group         | <1       | 1/228     | .62              |
|                                        | Time          | 29.28    | 1/228     | <b>&lt;.0001</b> |
|                                        | Time2         | 23.02    | 1/228     | <b>&lt;.0001</b> |
|                                        | Group*Time    | 7.83     | 1/228     | <b>.007</b>      |
| Conners Global Index-Parent Report     | Group         | .01      | 1/209     | .91              |
|                                        | Time          | 13.03    | 1/209     | <b>.0004</b>     |
|                                        | Time2         | 7.45     | 1/209     | <b>.007</b>      |
|                                        | Group*Time    | <1       | 1/209     | .36              |
| CSHQ-Bedtime Resistance                | Group         | <1       | 1/205     | .51              |
|                                        | Time          | 6.12     | 1/205     | <b>.01</b>       |
|                                        | Time2         | 2.75     | 1/205     | .10              |
|                                        | Group*Time    | <1       | 1/205     | .50              |
| CSHQ-Sleep Anxiety                     | Group         | <1       | 1/202     | .33              |
|                                        | Time          | 11.48    | 1/202     | <b>.0008</b>     |
|                                        | Time2         | 5.81     | 1/202     | <b>.02</b>       |
|                                        | Group*Time    | <1       | 1/202     | .94              |
| CSHQ-Total Sleep Problems              | Group         | 2.04     | 1/183     | .16              |
|                                        | Time          | 14.36    | 1/183     | <b>.0002</b>     |
|                                        | Time2         | 6.18     | 1/183     | <b>.01</b>       |
|                                        | Group*Time    | 1.48     | 1/183     | .23              |
| MASC-Parent Report                     | Group         | .25      | 1/53      | .62              |
|                                        | Time          | 3.58     | 1/53      | .06              |
|                                        | Group*Time    | 2.90     | 1/53      | .09              |

## Trigeminal Nerve Stimulation for ADHD

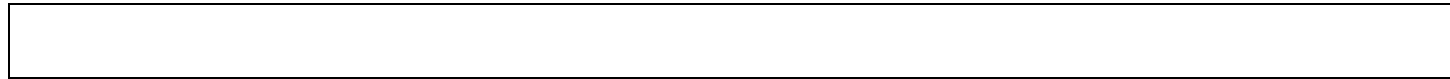

Note: boldface type indicates significance at  $p < .05$ . Italics indicate trend level effects at  $p < .10$ . ADHD-RS = ADHD Rating Scale;

CSHQ = Children's Sleep Health Questionnaire; MASC = Manifest Anxiety Scale for Children.

Trigeminal Nerve Stimulation for ADHD

**Table S2. Summary of F-Values for Treatment Effects on Resting State Electroencephalography (EEG) Spectral Power**

| Frequency Band | Electrode | Group   | Time     | Group*Time   |
|----------------|-----------|---------|----------|--------------|
| Delta          | F3        | <1      | <1       | 1.13         |
|                | F4        | <1      | 2.5      | 5.9*         |
|                | Fz        | <1      | <1       | 2.9          |
|                | C3        | <1      | <1       | 1            |
|                | C4        | <1      | 1.1      | 1.1          |
|                | Cz        | <1      | <1       | 1            |
|                | P3        | <1      | <1       | <1           |
|                | P4        | <1      | <1       | 1.3          |
|                | Pz        | <1      | <1       | <1           |
| Theta          | F3        | <1      | <1       | 1            |
|                | F4        | <1      | 2.6      | 6.2*         |
|                | Fz        | <1      | 1.1      | 2.9          |
|                | C3        | <1      | <1       | <1           |
|                | C4        | <1      | <1       | <1           |
|                | Cz        | <1      | <1       | <1           |
|                | P3        | <1      | 1.1      | <1           |
|                | P4        | <1      | <1       | <1           |
|                | Pz        | <1      | <1       | <1           |
| Beta 1/2       | F3        | <1, <1  | <1, <1   | <1, <1       |
|                | F4        | <1, <1  | 2.4, 1.2 | 5.2*, 6.0*   |
|                | Fz        | <1, <1  | <1, <1   | 3.3, 3.3     |
|                | C3        | <1, 1.5 | 1.5, 1.9 | <1, <1       |
|                | C4        | <1, <1  | <1, <1   | <1, <1       |
|                | Cz        | <1, 1   | <1, <1   | <1, <1       |
|                | P3        | <1, 1   | 2.6, 2.2 | <1, <1       |
|                | P4        | <1, <1  | <1, <1   | <1, <1       |
|                | Pz        | <1, 1.7 | <1, <1   | <1, <1       |
| Gamma 1, 2     | F3        | <1, <1  | <1, <1   | <1, <1       |
|                | F4        | <1, <1  | 1.4, 1.2 | 7.1**, 6.5** |
|                | Fz        | <1, <1  | <1, <1   | 4*, 3.8      |
|                | C3        | 1.2, <1 | 1.1, <1  | 1.2          |
|                | C4        | <1, <1  | <1, <1   | 1, <1        |

## Trigeminal Nerve Stimulation for ADHD

|    |          |         |          |
|----|----------|---------|----------|
| Cz | 1.6, 1.9 | <1, <1  | 1.2, 1.1 |
| P3 | 2, 2.2   | 1.3, <1 | <1, <1   |
| P4 | <1, <1   | <1, <1  | 1.6, 1   |
| Pz | 3.5, 3.7 | <1, <1  | <1, <1   |

Note: For all analyses, degrees of freedom = 1, 47-70. No significant effects were found in the alpha band. Italics indicate trend level effects at  $p < 0.10$ . Beta 1 = 13-16 Hz (hertz); Beta 2 = 17-25 Hz; C = central; Delta = 1-3 hertz (Hz); F = frontal; Gamma 1 = 30-40 Hz; Gamma 2 = 40-50 Hz; P = Parietal; Theta = 4-7 Hz;  
\*  $p < .05$ ; \*\*  $p < .01$ .

Trigeminal Nerve Stimulation for ADHD

**Table S3. Correlations Between Resting-state Electroencephalography (EEG) Power and Attention-Deficit/Hyperactivity Disorder (ADHD) Behaviors**

| <i>Electrode</i> | <i>Frequency Band</i> | <b>Correlation with Visit 4 ADHD-RS Scores</b> |                              |              |
|------------------|-----------------------|------------------------------------------------|------------------------------|--------------|
|                  |                       | <b>Inattentive</b>                             | <b>Hyperactive/Impulsive</b> | <b>Total</b> |
| F4               | Delta                 | -0.266                                         | -0.319                       | -0.35*       |
| F4               | Theta                 | -0.252                                         | -0.38*                       | -0.38*       |
| F4               | Beta 1                | -0.254                                         | -0.34*                       | -0.36*       |
| F4               | Beta 2                | -0.261                                         | -0.36*                       | -0.37*       |
| F4               | Gamma 1               | -0.229                                         | -0.31                        | -0.33        |
| F4               | Gamma 2               | -0.218                                         | -0.30                        | -0.31        |
| Fz               | Gamma 1               | -0.183                                         | -0.41*                       | -0.37*       |

Note: \* $p < .05$ .

Trigeminal Nerve Stimulation for ADHD

**Table S4. Spontaneously Reported Adverse Events (AEs)**

| Adverse Event                   | Participants Reporting [n (%)] |             |
|---------------------------------|--------------------------------|-------------|
|                                 | Active (n=32)                  | Sham (n=30) |
| Anxiety                         |                                | 1 (3)       |
| Bronchitis                      | 1 (3)                          |             |
| Headache                        | 3 (9)                          | 1 (3)       |
| Itching                         | 1 (3)                          |             |
| Lightheaded                     | 1 (3)                          |             |
| Mouth pain                      |                                | 1 (3)       |
| Nausea                          | 1 (3)                          |             |
| Nightmares                      |                                | 1 (3)       |
| Poor appetite                   | 1 (3)                          |             |
| Rash                            | 1 (3)                          |             |
| Rhinitis                        | 2 (6)                          | 2 (6)       |
| Skin<br>whitening/discoloration | 1 (3)                          | 1 (3)       |
| Stomachache                     | 2 (6)                          | 1 (3)       |
| Tooth pain                      | 1 (3)                          |             |
| Upper Respiratory Infection     | 3 (9)                          | 3 (10)      |
| Vomiting                        | 1 (3)                          |             |
| Wrist sprain                    |                                | 1 (3)       |

Note: All AE's were mild to moderate in clinical significance. There were no Serious Adverse Events (SAEs).
